# Supplementary material
Source: publisher site journal article supplement (https://www.dovepress.com/article/382252)
Supplement: Supplementary file 1 [file get_supplementary_file.php]

ORIGINAL RESEARCH

Li et al

**A multifunctional nano-delivery system against rheumatoid arthritis by combined phototherapy, hypoxia-activated chemotherapy, and RNA interference**

Xiangyu Li1*

Shixin Zhang1*

Miaomiao Zhang1

Ge Li1

Bo Yang1

Xinyue Lu1

Lesheng Teng1

Youxin Li1

Fengying Sun1

*These authors contributed equally to this work

1School of Life Sciences, Jilin University, Changchun, Jilin, China

Correspondence: Fengying Sun

School of Life Sciences, Jilin University, 2699 Qianjin Street, Changchun, Jilin 130012, China.

Tel +86-431-85155320

Fax +86-431-85155320

Email sunfengying@jlu.edu.cn

**Table S1.** PDI of HNs and PFHNs.

| NPs | PDI | SD |
| --- | --- | --- |
| CTAB-SPs | 0.071 | 0.048 |
| HNs | 0.296 | 0.015 |
| PFHNs (HNs:PEI-FA=4:1) | 0.188 | 0.087 |
| PFHNs (HNs:PEI-FA=2:1) | 0.101 | 0.042 |
| PFHNs (HNs:PEI-FA=1:1) | 0.091 | 0.034 |
| PFHNs (HNs:PEI-FA=1:2) | 0.207 | 0.021 |
| PFHNs (HNs:PEI-FA=1:4) | 0.245 | 0.013 |


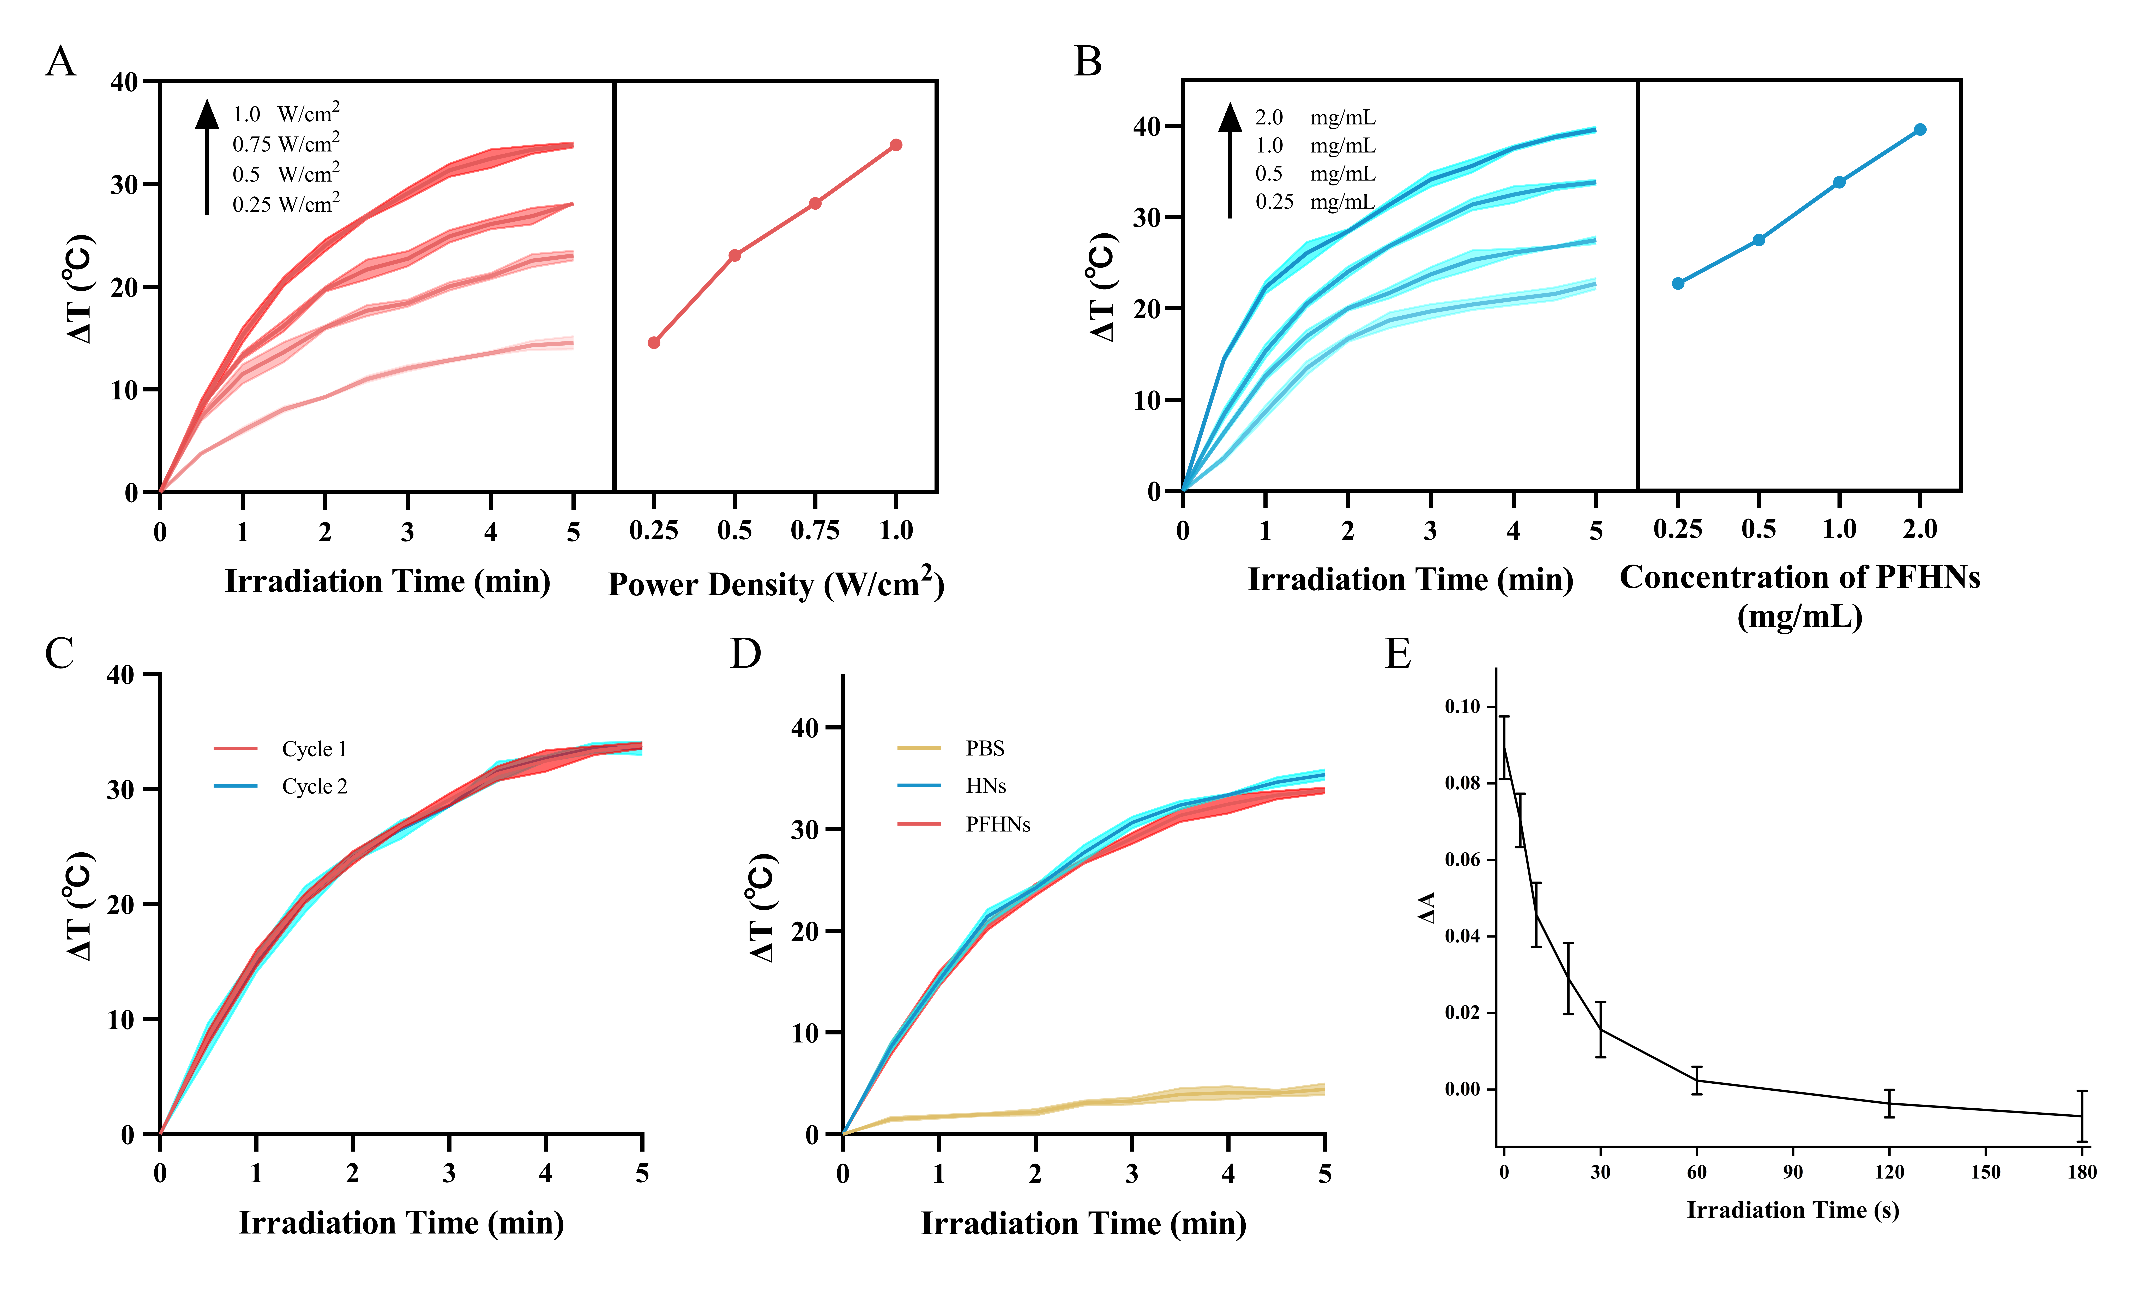


**Figure S1.** (A) ΔT of PFHNs suspension (1 mg/mL) upon NIR irradiation at various power densities, and ΔT-power density curve following 6-min NIR laser irradiation. (B) ΔT of PFHNs suspension at various concentrations upon NIR irradiation (1.0 W/cm2), and ΔT-concentration curve following 6-min NIR laser irradiation. (C) Photothermal stability of PFHNs. (D) ΔT of PBS, HNs, and PFHNs upon NIR irradiation (1.0 W/cm2). (E) *In vitro* NIR-induced ROS generation by PFHNs.


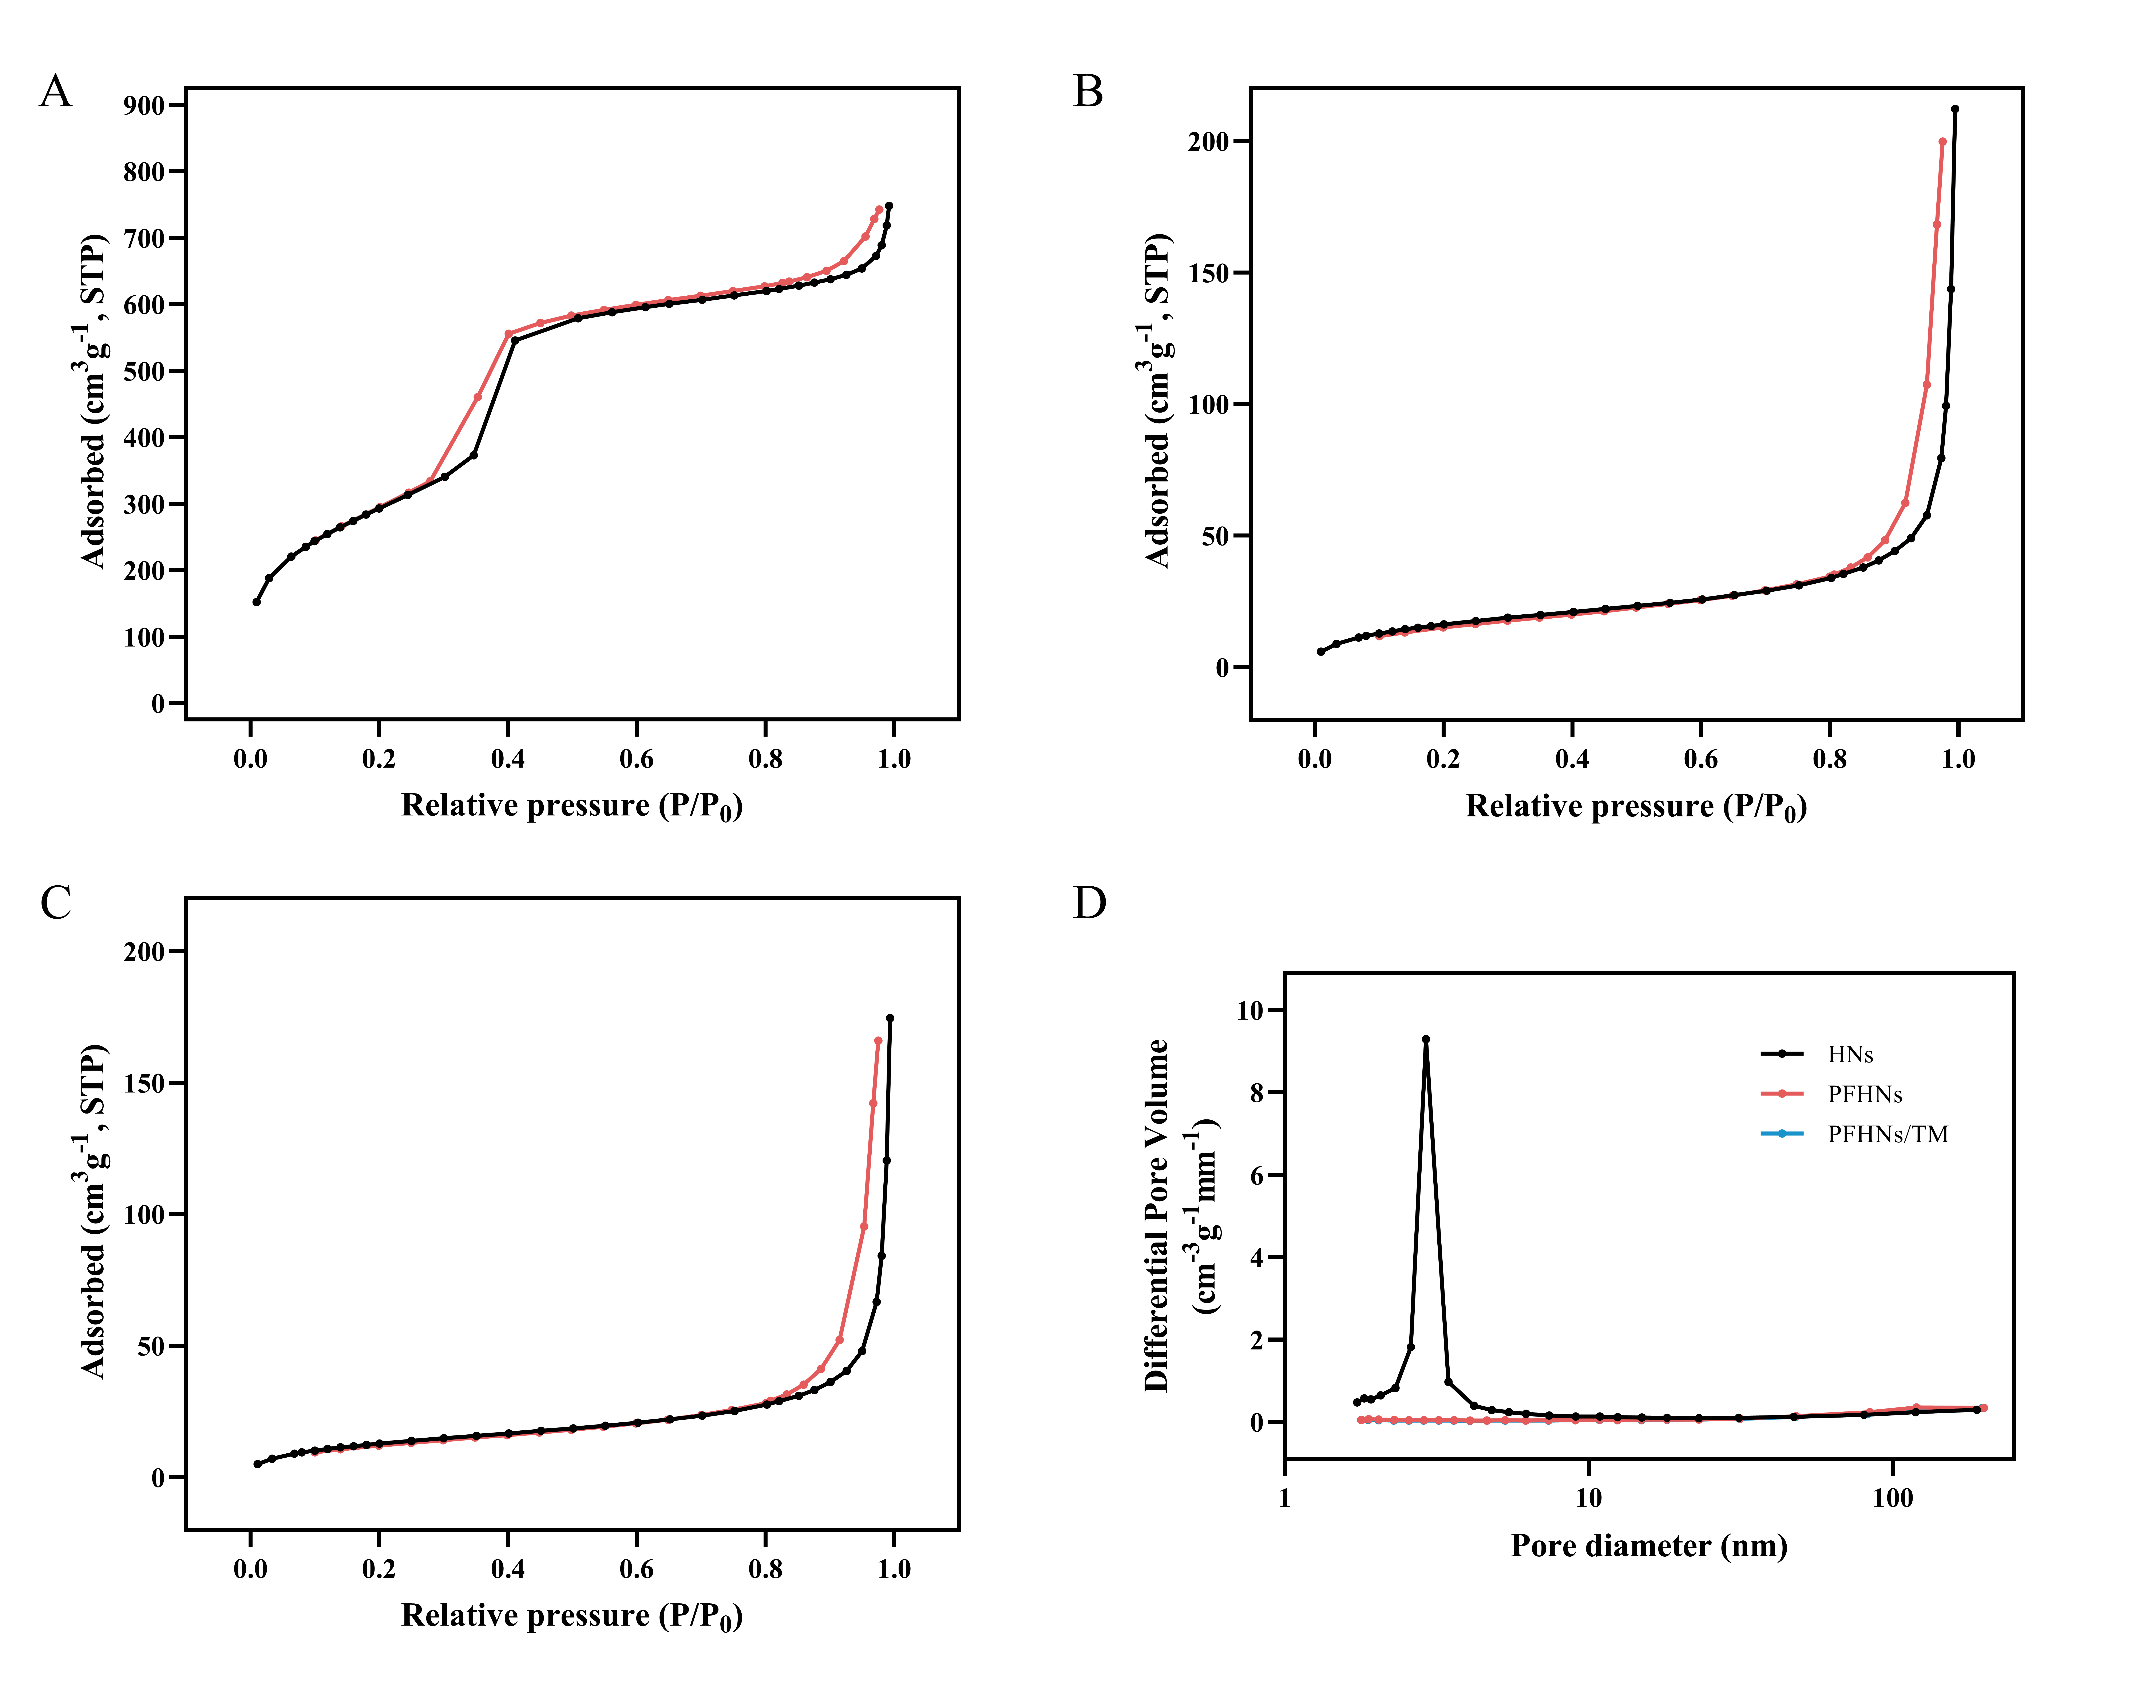


**Figure S2.** Nitrogen sorption isotherms of (A) HNs, (B) PFHNs and (C) PFHNs/TM. (D) Pore size distributions of HNs, PFHNs and PFHNs/TM.


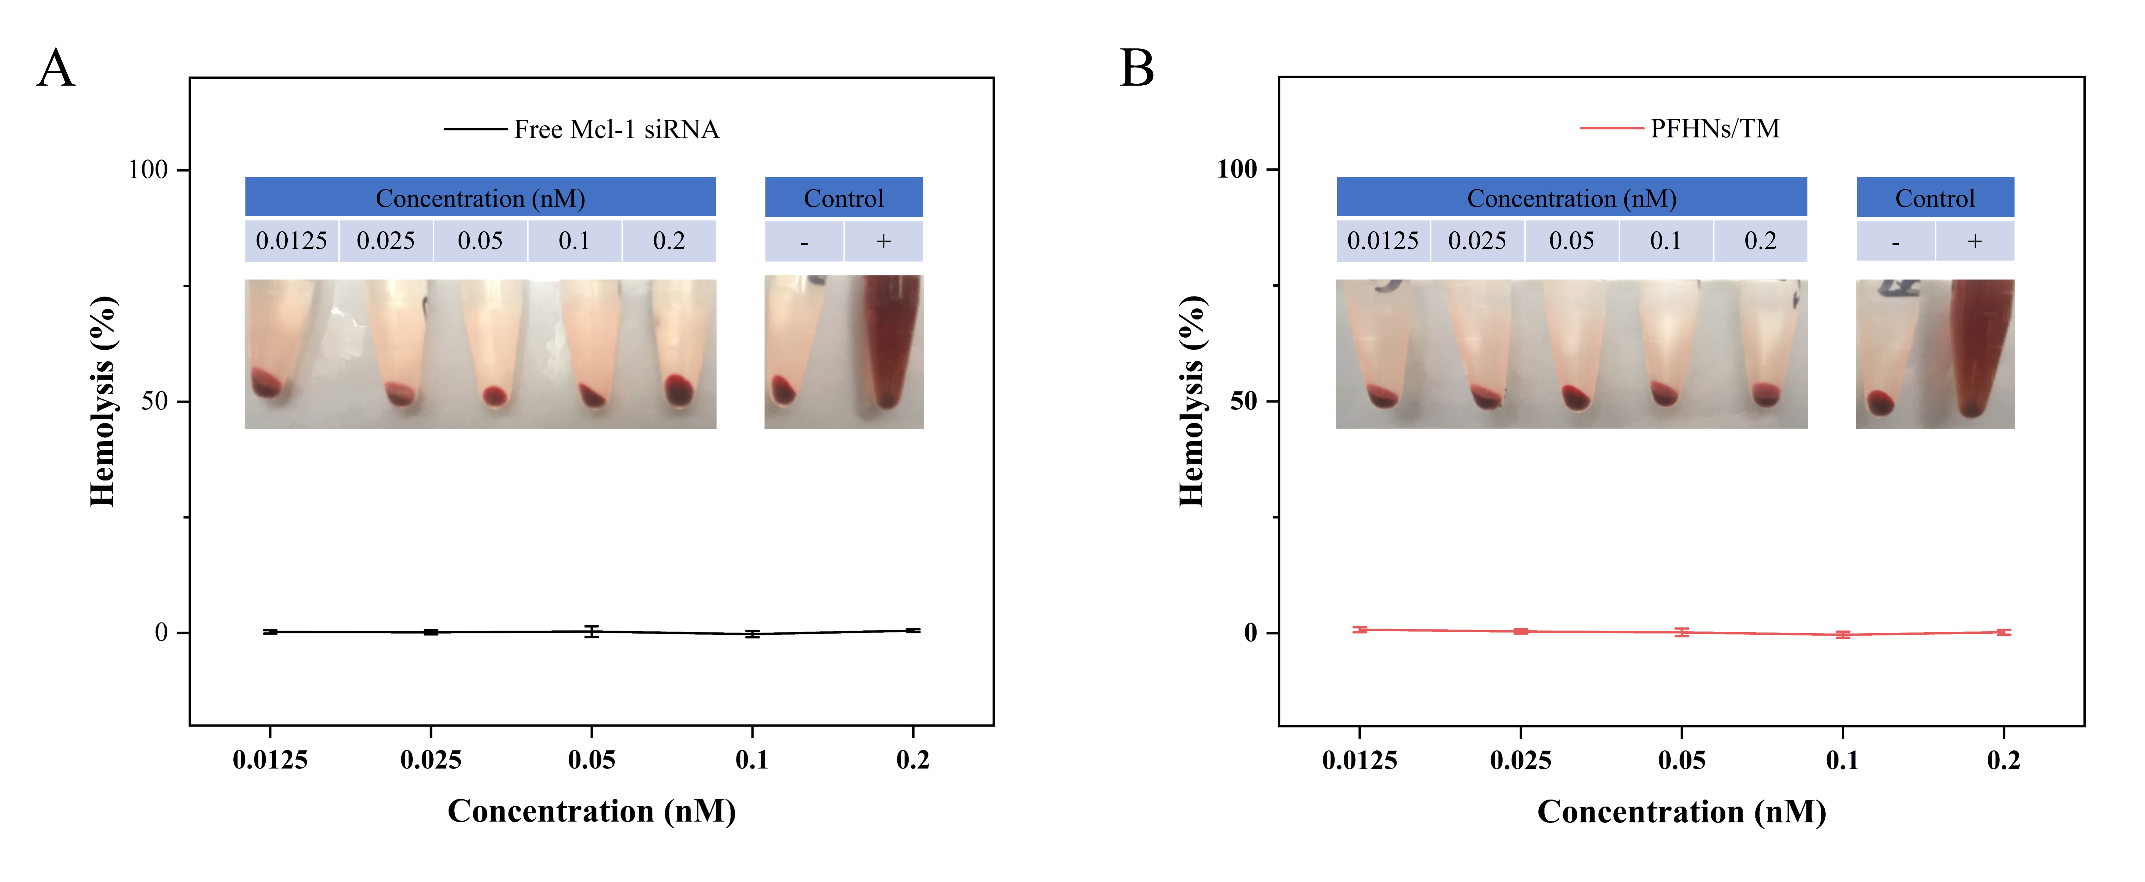


**Figure S3.** Hemolysis assay of free Mcl-1 siRNA (A) and PFHNs/TM (B).


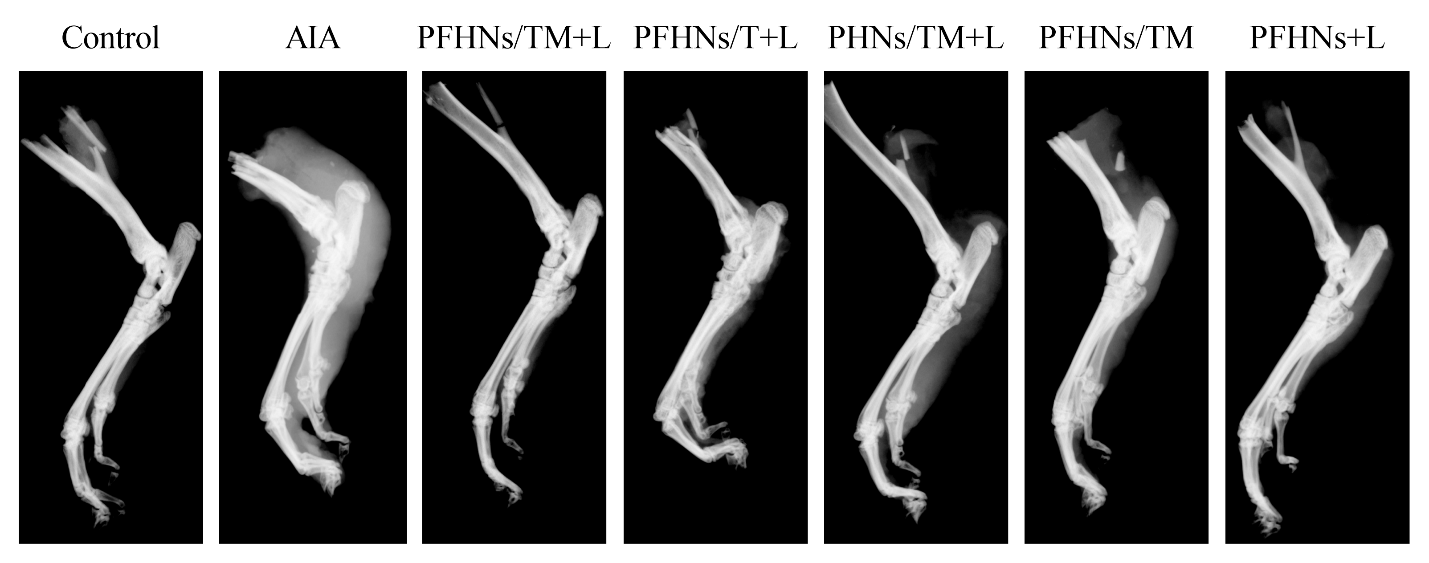


**Figure S4.** X-ray imaging of hind paws of rats from different groups.


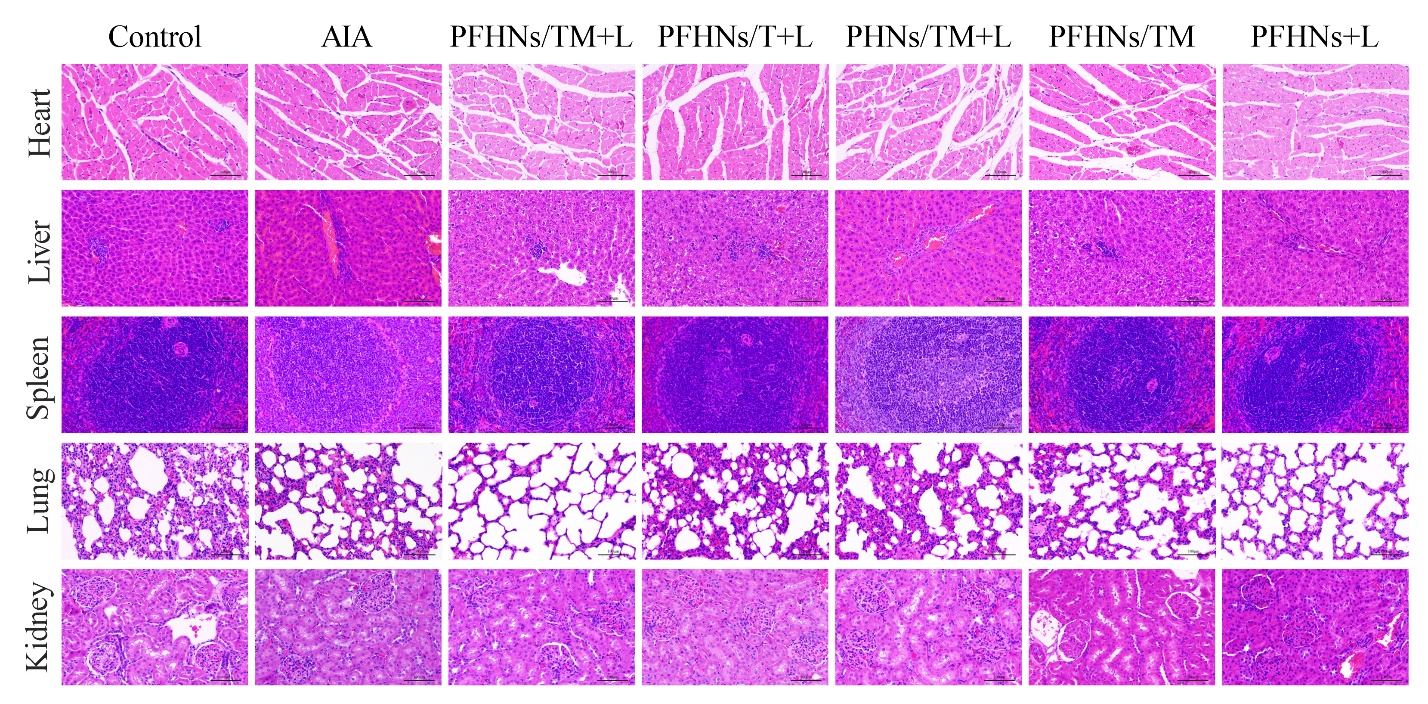


**Figure S5.** H&E staining of rat major organs from different groups.
